# Supplementary material for: Association and Predictive Value of Preoperative High-Sensitivity C-Reactive Protein for Postoperative Atrial Fibrillation After Video-Assisted Thoracoscopic Lobectomy: A Cohort Study Using the INSPIRE Database
Source: Research Square preprint supplement (doi:10.21203/rs.3.rs-8847142/v1), 2026-02-24
Supplement: Supplementary file 1 [file 57581361b5d8b49dd7c3ad52.docx]

Table S1. Baseline Characteristics of the INSPIRE VATS Lobectomy Cohort Stratified by POAF Status

| Variables | no-POAF (n = 3101) | POAF (n = 118) | P value |
| --- | --- | --- | --- |
| Hs-CRP, Median (IQR) | 0.1 (0.0, 0.3) | 0.3 (0.1, 2.2) | < 0.001 |
| Demographics |  |  |  |
| Age, Median (IQR) | 65.0 (55.0, 70.0) | 70.0 (65.0, 75.0) | < 0.001 |
| Male, n (%) | 1716 (55.3) | 88 (74.6) | < 0.001 |
| BMI, Median (IQR) | 23.4 (21.4, 25.7) | 23.9 (22.0, 25.7) | 0.141 |
| Comorbidities, n (%) |  |  |  |
| Diabetes | 53 (1.7) | 0 (0) | 0.264 |
| Hypertension | 160 (5.2) | 15 (12.7) | < 0.001 |
| Carotid_artery_stenosis | 24 (0.8) | 2 (1.7) | 0.246 |
| Cerebral_infarction | 38 (1.2) | 4 (3.4) | 0.066 |
| CHD | 134 (4.3) | 9 (7.6) | 0.087 |
| COPD | 211 (6.8) | 13 (11) | 0.078 |
| CKD | 22 (0.7) | 0 (0) | 0.999 |
| Medication history, n (%) |  |  |  |
| ACEI | 6 (0.2) | 1 (0.8) | 0.230 |
| ARB | 81 (2.6) | 1 (0.8) | 0.369 |
| β_blockers | 101 (3.3) | 4 (3.4) | 0.793 |
| CCB | 376 (12.1) | 16 (13.6) | 0.640 |
| DPP_4_inhibitors | 62 (2) | 2 (1.7) | 0.999 |
| Metformin | 18 (0.6) | 1 (0.8) | 0.509 |
| Antiplatelet | 49 (1.6) | 3 (2.5) | 0.438 |
| Anticoagulants | 68 (2.2) | 8 (6.8) | 0.006 |
| Statins | 223 (7.2) | 19 (16.1) | < 0.001 |
| sulfonylureas | 57 (1.8) | 6 (5.1) | 0.026 |
| thiazolidinediones | 9 (0.3) | 0 (0) | 0.999 |
| Insulin | 87 (2.8) | 4 (3.4) | 0.575 |
| Surgical lung lobe, n (%) |  |  |  |
| Right_upper | 780 (25.2) | 26 (22) | 0.443 |
| Right_lower | 578 (18.6) | 18 (15.3) | 0.353 |
| Right_middle | 208 (6.7) | 6 (5.1) | 0.487 |
| Left_upper | 547 (17.6) | 25 (21.2) | 0.323 |
| Left_lower | 353 (11.4) | 14 (11.9) | 0.872 |
| Complete lobectomy, n (%) |  |  |  |
| Right | 494 (15.9) | 25 (21.2) | 0.128 |
| Left | 24 (0.8) | 0 (0) | 0.999 |
| Number of lobes resected, n (%) |  |  |  |
| =2 | 91 (2.9) | 3 (2.5) | 0.999 |
| >2 | 26 (0.8) | 1 (0.8) | 0.999 |
| ASA, n (%) |  |  | < 0.001 |
| <3 | 2920 (94.2) | 96 (81.4) |  |
| ≥3 | 181 (5.8) | 22 (18.6) |  |
| Operating_time, Median (IQR) | 130.0 (95.0, 170.0) | 162.5 (125.0, 220.0) | < 0.001 |
| Anesthesia_time, Median (IQR) | 180.0 (140.0, 230.0) | 215.0 (175.0, 280.0) | < 0.001 |
| Intraoperative_hypotension, n (%) | 29 (0.9) | 1 (0.8) | 0.999 |
| Intraoperative_bradycardia, n (%) | 27 (0.9) | 0 (0) | 0.624 |
| Intraoperative_fluid, Median (IQR) | 800.0 (650.0, 1000.0) | 1000.0 (800.0, 1150.0) | < 0.001 |
| Blood_loss, Median (IQR) | 153.5 (86.7, 260.4) | 213.3 (155.5, 364.6) | < 0.001 |
| Urine_output, Median (IQR) | 159.5 (90.3, 256.7) | 186.9 (116.7, 311.7) | 0.006 |
| Laboratory tests, median (IQR) |  |  |  |
| HB | 13.2 (12.2, 14.2) | 13.2 (11.9, 14.2) | 0.340 |
| Hct | 39.1 (37.0, 42.0) | 39.1 (35.2, 42.0) | 0.425 |
| Albumin | 4.1 (3.9, 4.3) | 4.0 (3.7, 4.2) | < 0.001 |
| WBC | 6.3 (5.2, 7.5) | 6.7 (5.6, 8.4) | 0.002 |
| Platelet | 233.0 (189.0, 273.0) | 200.0 (169.0, 258.0) | 0.002 |
| Creatinine | 0.8 (0.7, 0.9) | 0.9 (0.7, 1.0) | < 0.001 |
| Aptt | 30.6 (29.1, 33.0) | 30.6 (29.1, 33.0) | 0.671 |
| Fibrinogen | 301.0 (263.0, 341.0) | 327.0 (288.0, 397.0) | < 0.001 |
| Glucose | 110.0 (96.0, 132.0) | 110.0 (96.0, 132.0) | 0.886 |
| Lymphocyte | 28.7 (22.1, 34.1) | 26.4 (18.3, 34.1) | 0.023 |
| Neutrophil | 58.6 (53.1, 67.5) | 61.0 (53.1, 71.7) | 0.045 |

Values are presented as median (interquartile range, IQR) for continuous variables and number (percentage) for categorical variables. Between-group comparisons were performed using the Mann–Whitney U test for continuous variables and the χ² test or Fisher’s exact test for categorical variables, as appropriate. POAF was defined as new-onset atrial fibrillation occurring during the index hospitalization after thoracoscopic lobectomy. Preoperative hs-CRP was measured on admission.

**Abbreviations:** POAF, postoperative atrial fibrillation; hs-CRP, high-sensitivity C-reactive protein; BMI, body mass index; CHD, coronary heart disease; COPD, chronic obstructive pulmonary disease; CKD, chronic kidney disease; ACEI, angiotensin-converting enzyme inhibitor; ARB, angiotensin receptor blocker; CCB, calcium channel blocker; DPP-4, dipeptidyl peptidase-4; ASA, American Society of Anesthesiologists physical status classification; HB, hemoglobin; Hct, hematocrit; WBC, white blood cell count; APTT, activated partial thromboplastin time; IQR, interquartile range.

Table S2. Performance Comparison of Machine-Learning Models for Predicting Postoperative Atrial Fibrillation (POAF)

| model | accuracy | auc | recall | prection | f1 | kappa | brier |
| --- | --- | --- | --- | --- | --- | --- | --- |
| CatBoost Classifier | 0.9738 | 0.9026 | 0.3113 | 0.927 | 0.46 | 0.4502 | 0.0262 |
| Light Gradient Boosting Machine | 0.9731 | 0.8759 | 0.3108 | 0.8705 | 0.4519 | 0.4416 | 0.0269 |
| Random Forest Classifier | 0.9703 | 0.87 | 0.2069 | 0.9429 | 0.3269 | 0.3187 | 0.0297 |
| Extreme Gradient Boosting | 0.9734 | 0.869 | 0.3394 | 0.8248 | 0.4772 | 0.4664 | 0.0266 |
| Extra Trees Classifier | 0.9717 | 0.8637 | 0.2446 | 0.95 | 0.3793 | 0.3704 | 0.0283 |
| Logistic Regression | 0.9641 | 0.8469 | 0.1424 | 0.5076 | 0.2159 | 0.2047 | 0.0359 |
| Naive Bayes | 0.3059 | 0.796 | 0.9056 | 0.0501 | 0.0944 | 0.0268 | 0.6941 |
| Decision Tree Classifier | 0.9406 | 0.6654 | 0.3684 | 0.284 | 0.3174 | 0.2874 | 0.0594 |
| SVM - Linear Kernel | 0.8567 | 0.5641 | 0.1143 | 0.0072 | 0.0136 | -0.0007 | 0.1433 |
| K Neighbors Classifier | 0.961 | 0.5204 | 0 | 0 | 0 | -0.0045 | 0.039 |

Model performance was evaluated on the test set using standard classification metrics, including accuracy, area under the receiver operating characteristic curve (AUC), recall (sensitivity), precision (positive predictive value), F1 score, Cohen’s kappa, and Brier score. Higher values indicate better performance for accuracy, AUC, recall, precision, F1 score, and kappa; a lower Brier score indicates better probabilistic calibration. The best-performing model in this comparison was the CatBoost classifier (AUC = 0.9026).

**Abbreviations:** AUC, area under the receiver operating characteristic curve; F1, harmonic mean of precision and recall; POAF, postoperative atrial fibrillation; SVM, support vector machine.

Table S3. Association Between Preoperative hs-CRP and Postoperative Atrial Fibrillation: in patients with complete data

|  | Model 1 |  |  | Model 2 |  |  | Model 3 |  |  |
| --- | --- | --- | --- | --- | --- | --- | --- | --- | --- |
|  | OR（95%CI） | P value | P for trend | OR（95%CI） | P value | P for trend | OR（95%CI） | P value | P for trend |
| POAF |  |  |  |  |  |  |  |  |  |
| Per SD increase | 1.34 (1.20~1.49) | <0.001 |  | 1.28 (1.14~1.43) | <0.001 |  | 1.18 (1.02~1.36) | 0.024 |  |
|  |  |  | <0.001 |  |  | <0.001 |  |  | 0.015 |
| Low risk | 1(Ref) |  |  | 1(Ref) |  |  | 1(Ref) |  |  |
| Medium risk | 2.13 (1.19~3.83) | 0.011 |  | 1.73 (0.96~3.14) | 0.070 |  | 1.45 (0.77~2.72) | 0.253 |  |
| High risk | 3.43 (2.16~5.45) | <0.001 |  | 2.72 (1.68~4.40) | <0.001 |  | 1.86 (1.01~3.42) | 0.045 |  |

Odds ratios (ORs) and 95% confidence intervals (CIs) were estimated using logistic regression to evaluate the association between preoperative high-sensitivity C-reactive protein (hs-CRP) and postoperative atrial fibrillation (POAF). hs-CRP was analyzed (i) as a continuous variable per 1 standard deviation (SD) increase and (ii) as a categorical variable using clinically relevant cutoffs: low (<1 mg/L), medium (1–3 mg/L), and high (≥3 mg/L), with the low-risk group as the reference. P for trend was calculated by modeling the hs-CRP category as an ordinal variable.

**Model specification.** Model 1 was unadjusted. Model 2 was adjusted for key demographic and baseline clinical covariates. Model 3 was fully adjusted for demographic characteristics, comorbidities, medication history, and perioperative factors.

Table S4. Association Between Preoperative hs-CRP Categories and Postoperative Atrial Fibrillation Across Crude, Multivariable-Adjusted, and Matched Analyses

| Models | Hs-CRP | OR (95%CI) | P value |
| --- | --- | --- | --- |
| Original.crude | Low Risk | Reference |  |
| Medium Risk | 2.13 (1.19~3.83) | 0.011 |
| High Risk | 3.43 (2.16~5.45) | <0.001 |
| Multivariable.adjusted | Low Risk | Reference |  |
| Medium Risk | 1.68 (0.90~3.13) | 0.102 |
| High Risk | 2.50 (1.49~4.19) | 0.001 |
| Matched | Low Risk | Reference |  |
| Medium Risk | 2.05 (0.50~8.40) | 0.318 |
| High Risk | 3.93 (1.07~14.46) | 0.039 |

Odds ratios (ORs) and 95% confidence intervals (CIs) were estimated to evaluate the association between preoperative high-sensitivity C-reactive protein (hs-CRP) categories and postoperative atrial fibrillation (POAF). hs-CRP categories were defined as low risk (reference), medium risk, and high risk according to prespecified cutoffs. Results are shown for three analytic approaches: (1) **Original (crude)**, unadjusted model; (2) **Multivariable-adjusted**, logistic regression adjusted for prespecified covariates; and (3) **Matched**, analysis performed in the matched cohort. P values are two-sided, with statistical significance set at 0.05.


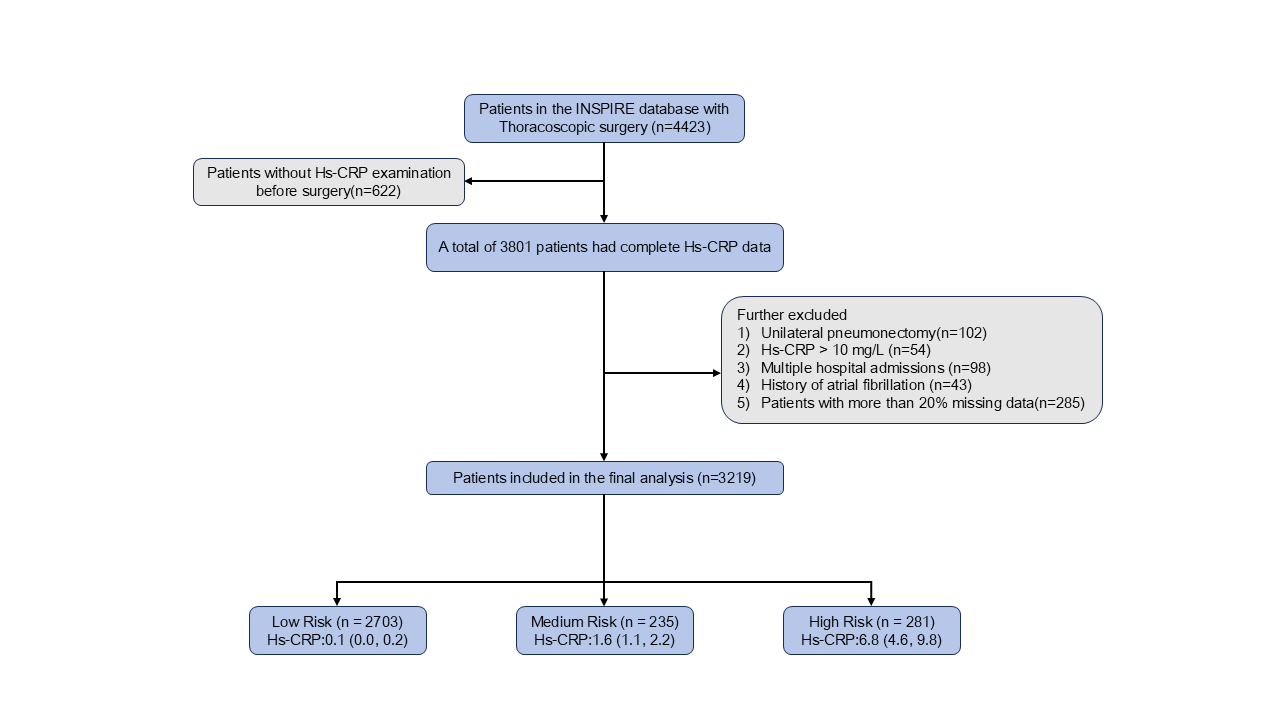


Figure S1. Study flow chart and cohort derivation.

Among 4,423 patients who underwent thoracoscopic surgery in the INSPIRE database, 622 without preoperative high-sensitivity C-reactive protein (hs-CRP) testing were excluded, leaving 3,801 patients with complete hs-CRP data. Additional exclusions were unilateral pneumonectomy (n=102), hs-CRP >10 mg/L (n=54), multiple hospital admissions (n=98), prior atrial fibrillation (n=43), and >20% missing data (n=285), yielding 3,219 patients for the final analysis. Patients were categorized by preoperative hs-CRP level into low risk (<1 mg/L; n=2,703; hs-CRP 0.1 [0.0–0.2]), medium risk (1–3 mg/L; n=235; 1.6 [1.1–2.2]), and high risk (≥3 mg/L; n=281; 6.8 [4.6–9.8]). Values for hs-CRP are presented as median (interquartile range).
